# Supplementary material
Source: PubMed Central journal article supplement (PMC3786604)

Supplementary Figure 1  
MS<sup>2</sup> of *m/z* 272.2

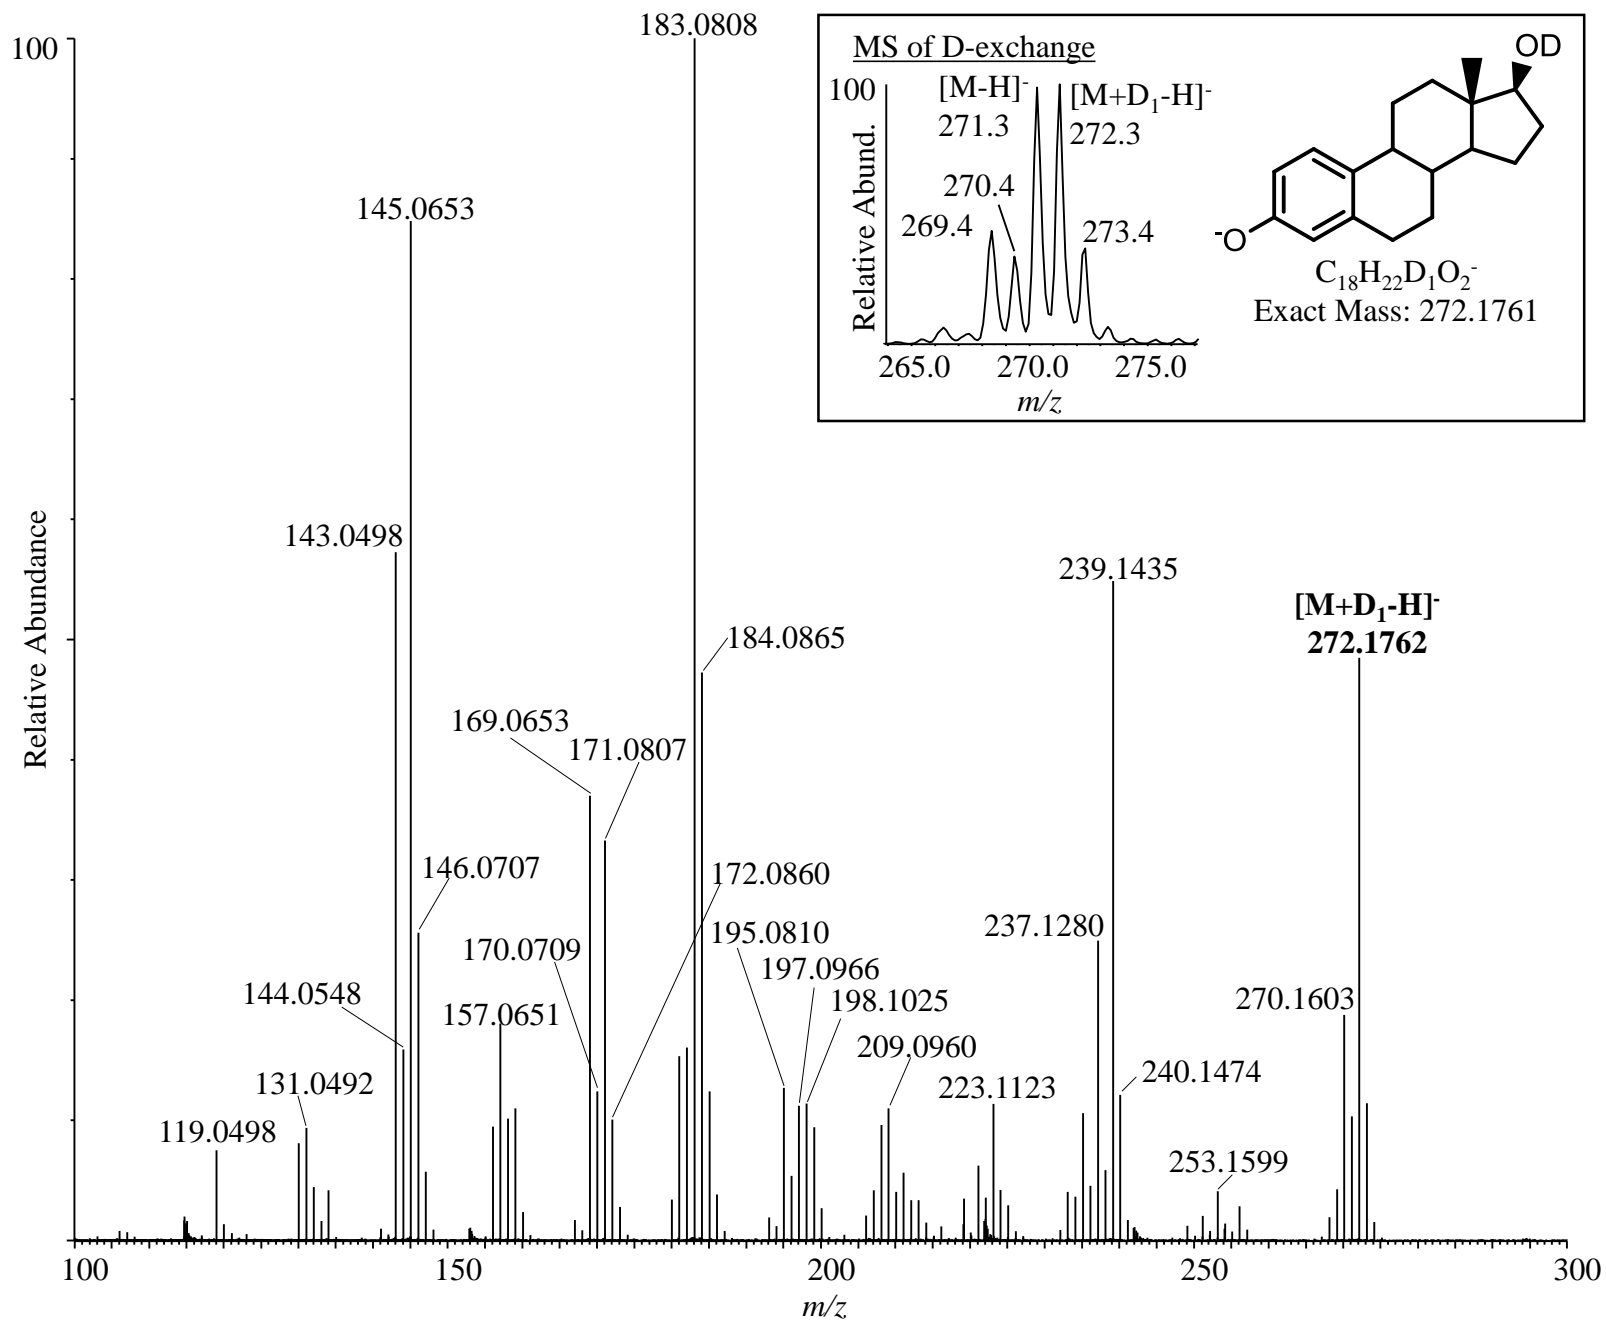

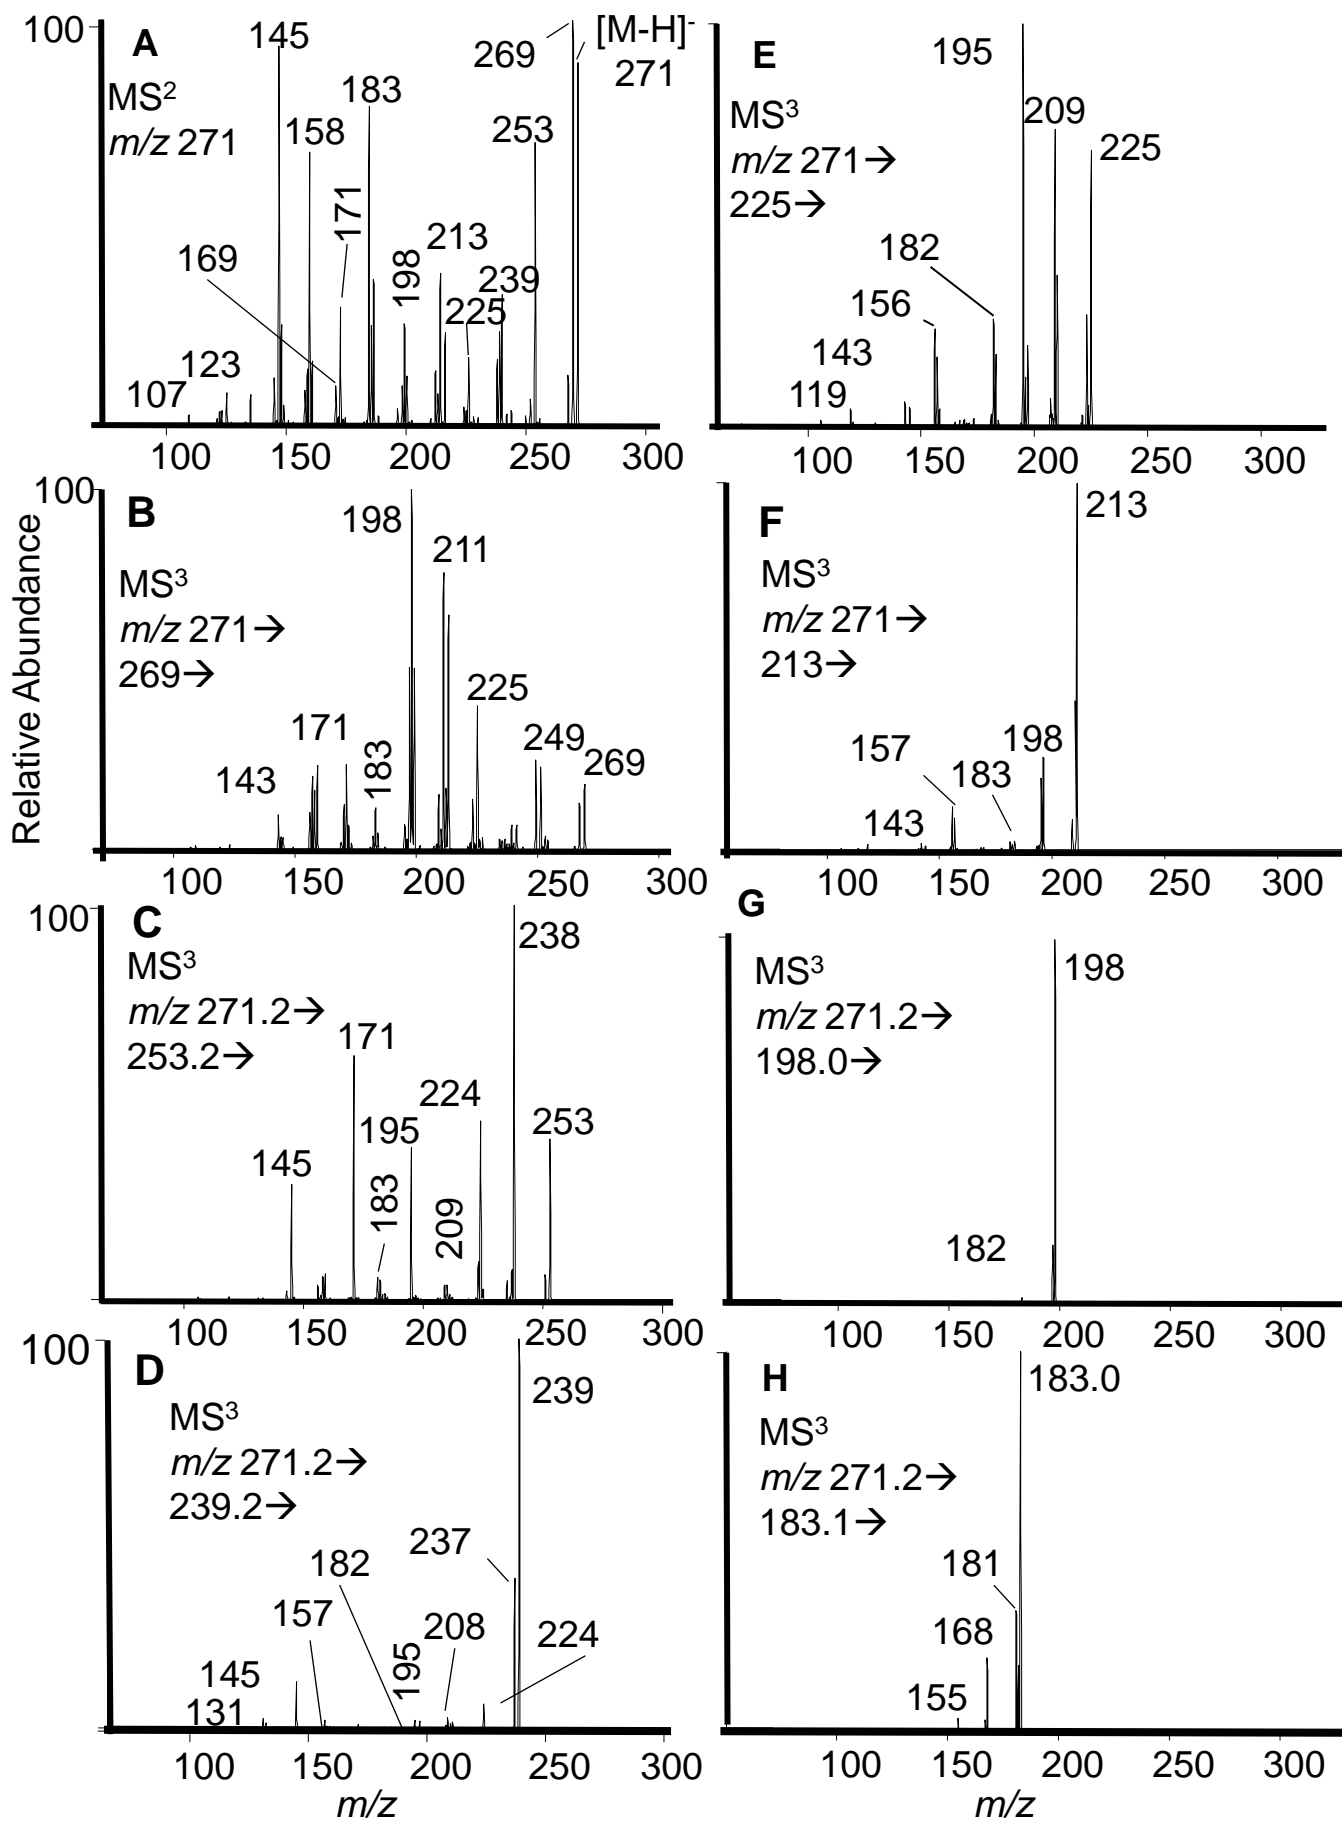

Supplementary Figure 3 MS<sup>2</sup> of E1, D4-E1, E3, D4-E3

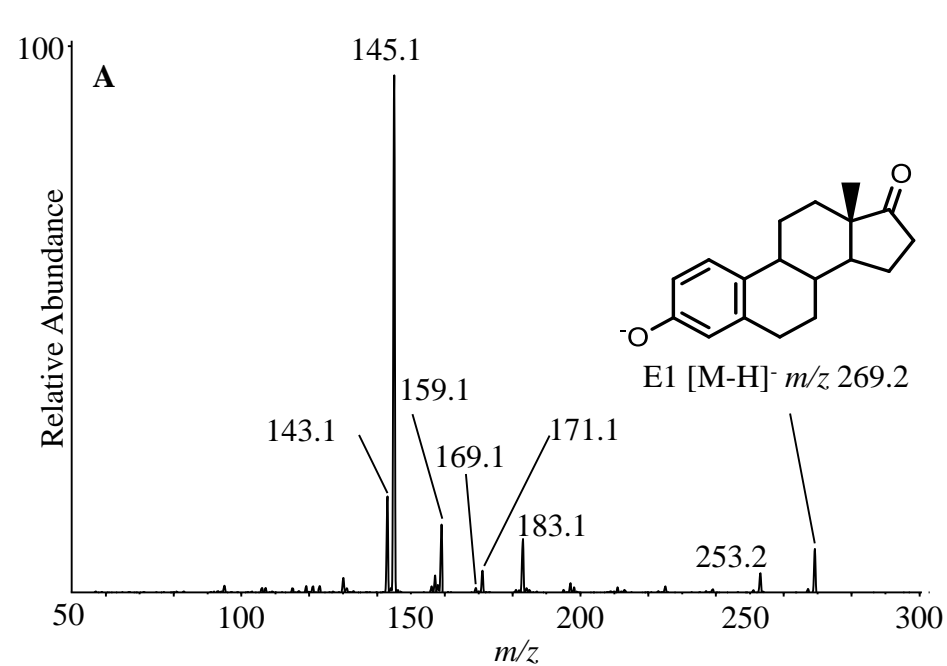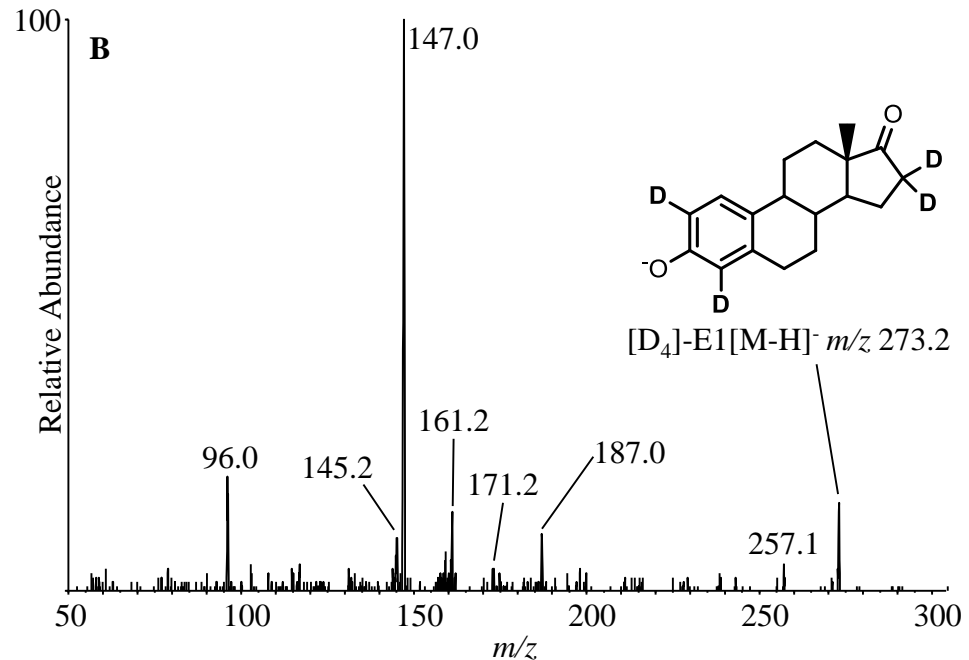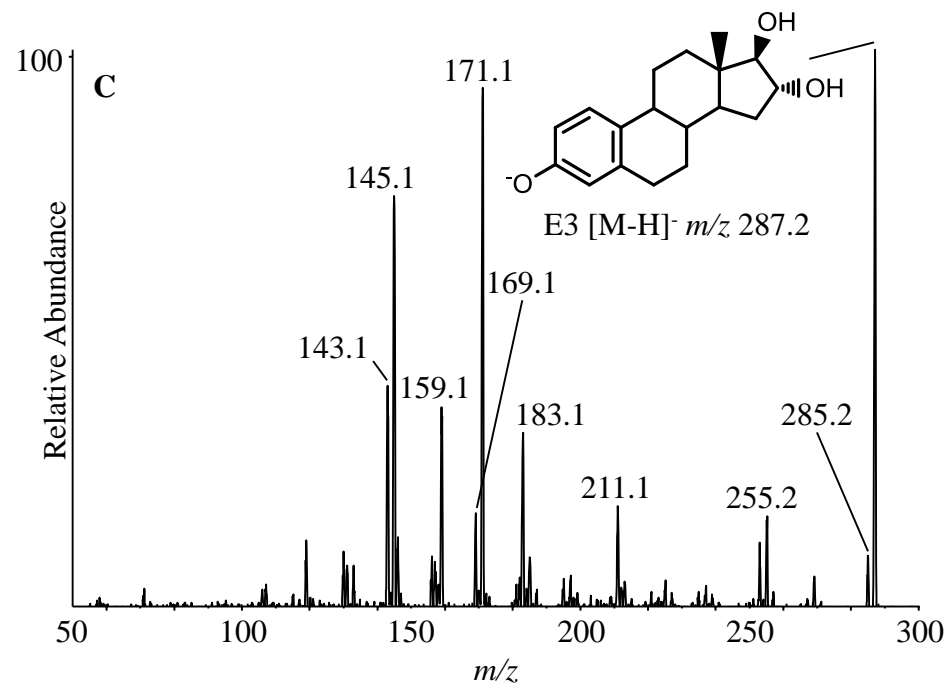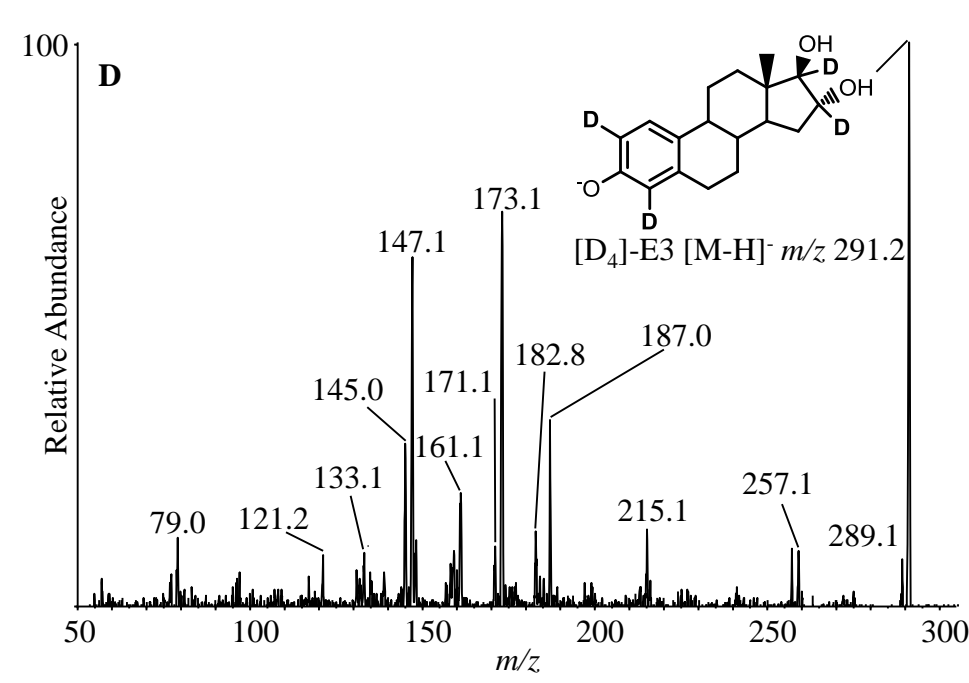

Supplementary Figure 4 MS<sup>3</sup> of 271/269/287→183 and 271/269/287→169

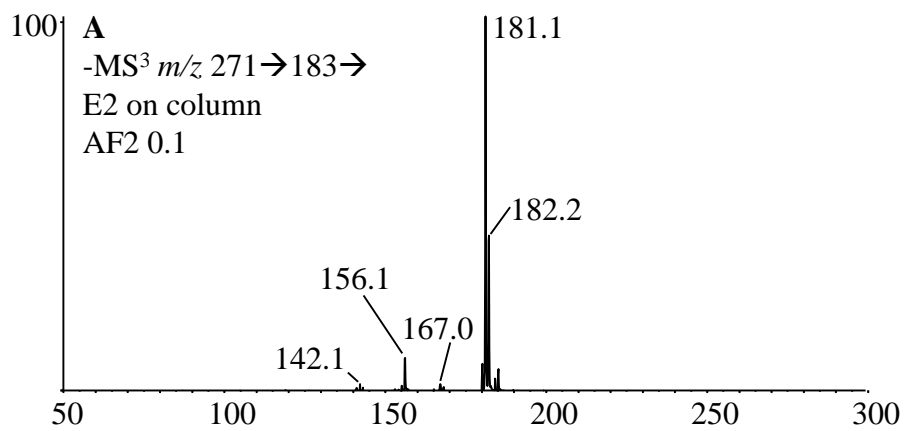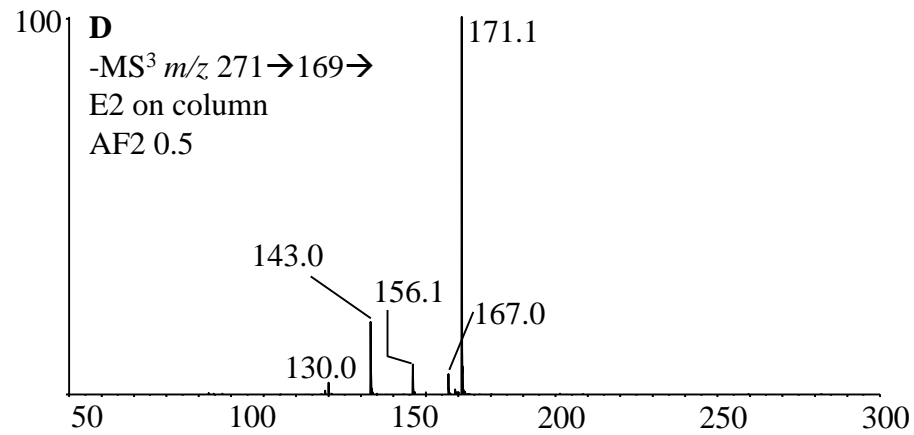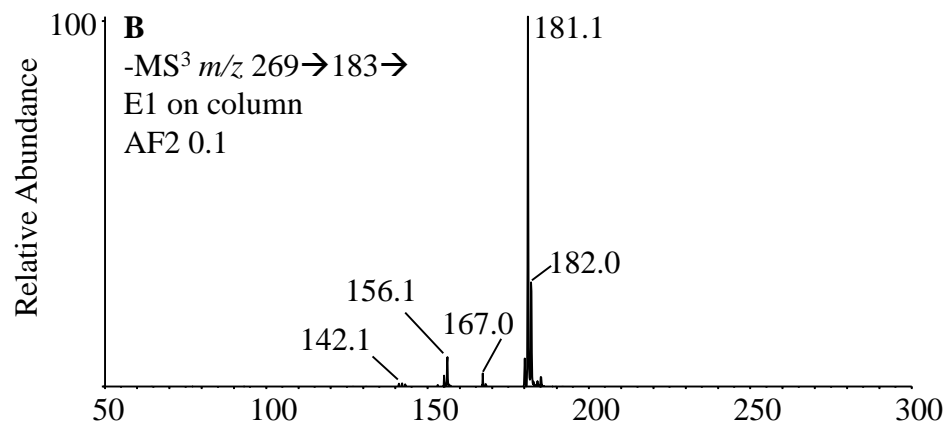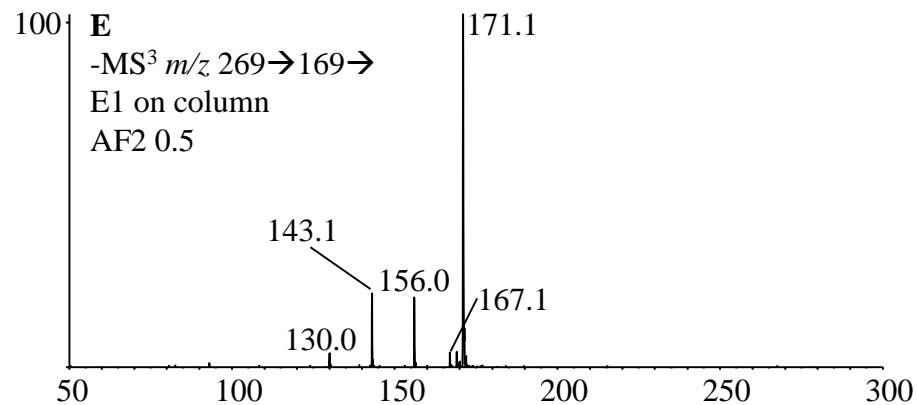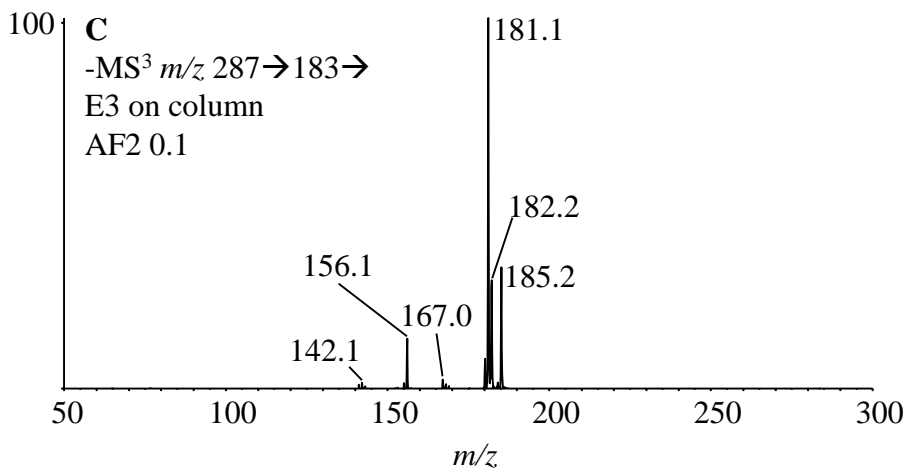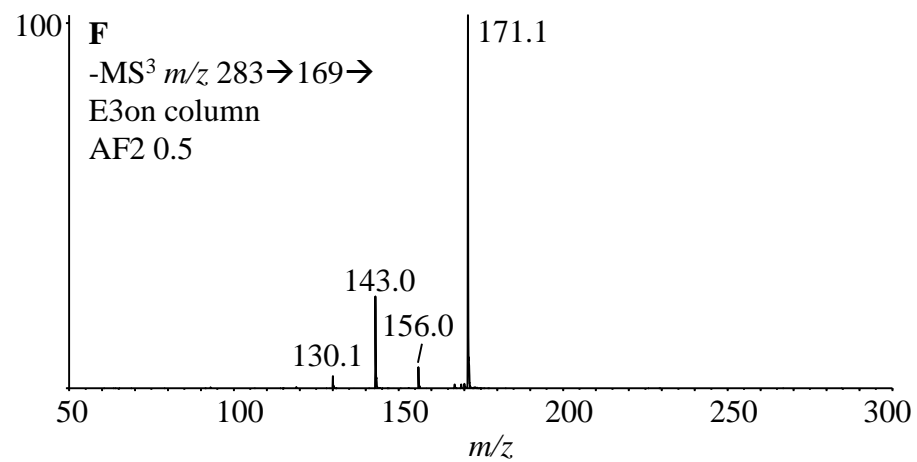

Supplement: NIHMS516830-supplement-13361_2013_705_MOESM1_ESM.pdf [file NIHMS516830-supplement-13361_2013_705_MOESM1_ESM.pdf]
