# Supplementary material
Source: PubMed Central journal article supplement (PMC3786604)
Supplement: NIHMS516830-supplement-13361_2013_705_MOESM2_ESM.pdf [file NIHMS516830-supplement-13361_2013_705_MOESM2_ESM.pdf]

# Supplementary Scheme 1

| Ion | Exact Mass<br>m/z | Chemical<br>Formula                            | Structure                                                                            | Reference                                           |
|-----|-------------------|------------------------------------------------|--------------------------------------------------------------------------------------|-----------------------------------------------------|
| a   | 145.0653          | C <sub>10</sub> H <sub>9</sub> O <sup>-</sup>  | 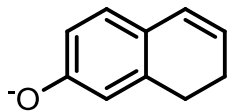   | Croley 2000, Bourcier 2010, Magi 2010, Rannulu 2012 |
| b   | 183.0810          | C <sub>13</sub> H <sub>11</sub> O <sup>-</sup> |    | Gentili 2002                                        |
| b*  | 183 <sup>1</sup>  | C <sub>14</sub> H <sub>17</sub> O <sup>-</sup> |    | Croley 2000                                         |
| c   | 143.0497          | C <sub>10</sub> H <sub>7</sub> O <sup>-</sup>  |    | Croley 2000, Magi 2010, Rannulu 2012                |
| d   | 239.1436          | C <sub>17</sub> H <sub>19</sub> O <sup>-</sup> |   | Magi 2010                                           |
| e   | 169.06534         | C <sub>12</sub> H <sub>9</sub> O <sup>-</sup>  |  | Rannulu 2012                                        |
| f   | 119.0497          | C <sub>8</sub> H <sub>7</sub> O <sup>-</sup>   |  | Rannulu 2012                                        |

<sup>1</sup>Calculated exact mass for this structure is 201.1279
